# Supplementary material for: A one-step rapid synthesis of TS-1 zeolites with highly catalytically active mononuclear TiO6species
Source: Royal Society of Chemistry journal article supplement (doi:10.1039/c9ta13851j), 2020-01-01
Supplement: c9ta13851j1.pdf [file c9ta13851j1.pdf]

## **Electronic Supplementary Information (ESI)**

### **One-step rapid synthesis of TS-1 zeolites with highly catalytic active mononuclear TiO<sub>6</sub> species**

Wenjing Xu,<sup>a</sup> Tianjun Zhang,<sup>ac</sup> Risheng Bai,<sup>a</sup> Peng Zhang,<sup>c</sup> Jihong Yu<sup>\*ab</sup>

<sup>a</sup> State Key Laboratory of Inorganic Synthesis and Preparative Chemistry, College of Chemistry, Jilin University, Changchun 130012, P. R. China.

<sup>b</sup> International Center of Future Science, Jilin University, 2699 Qianjin Street, Changchun 130012, P. R. China.

<sup>c</sup> Department of Chemistry, Dalhousie University, Halifax, Nova Scotia B3H 4R2, Canada.

## **Chemicals and materials**

The reagents used in this work include tetraethylorthosilicate (TEOS, Shanghai Chemical Reagent), tetrabutyl orthotitanate (TBOT, Shanghai Chemical Reagent), tetrapropylammonium hydroxide (25 wt%, Guangfu Fine Chemical Research Institute), H<sub>2</sub>O<sub>2</sub> (30 wt%, Beijing Chemical Works), 1-hexene (98%, Aladdin), methanol (99%, Guangfu Fine Chemical Research Institute), ethanol (99%, Guangfu Fine Chemical Research Institute), and chlorobenzene (99%, DaMao Chemical Reagent Factory).

## **Characterizations**

The crystallinity and phase purity of the samples were characterized by power X-ray diffraction (XRD) on a Rigaku D- Max 2550 diffractometer using Cu K $\alpha$  radiation ( $\lambda = 1.5418 \text{ \AA}$ ). The crystal size and morphology were measured by a scanning electron microscopy (SEM) using a JSM-6700F (JEOL) electron microscope. Transmission electron microscopy (TEM) images were recorded with a Tecnai F20 electron microscope. Nitrogen adsorption/desorption measurements were carried out on a Micromeritics 2020 analyzer at 77 K after degassing the samples at 623 K under vacuum. Chemical compositions were determined with an X-ray fluorescence (XRF) spectrometer (PANalytical, AXIOS). Infrared spectra (IR) were recorded by Nicolet Impact 410 FT-IR Infrared Instrument using KBr pellet technique. The UV-Vis DRS (diffuse reflectance spectroscopy) of the catalyst was recorded over the range of 200 nm to 500 nm against the support as reference, on a SHIMADZU U-4100. X-ray photoelectron spectroscopy (XPS) was performed using an ESCALAB 250 spectrometer. Ultraviolet Raman resonance spectroscopy (UV-Raman) (266 nm) were recorded on a DL-2 Raman spectrometer using the 266 nm line of a He-Ge laser as the excitation source and a Princeton CCD as the detector. X-ray absorption spectroscopy data were collected at the Sector 20-BM beamline of the Advanced Photon Source at Argonne National Laboratory. Sample powders were packed on plastic washer and folded multiple times to enhance the signal. The beamline was equipped with a double-crystal Si (111) monochromator. A 12-element Ge fluorescence detector was used to collect spectra of the Ti K-edge. Data processing and EXAFS fitting were performed using the Athena, Artemis and Igor software.

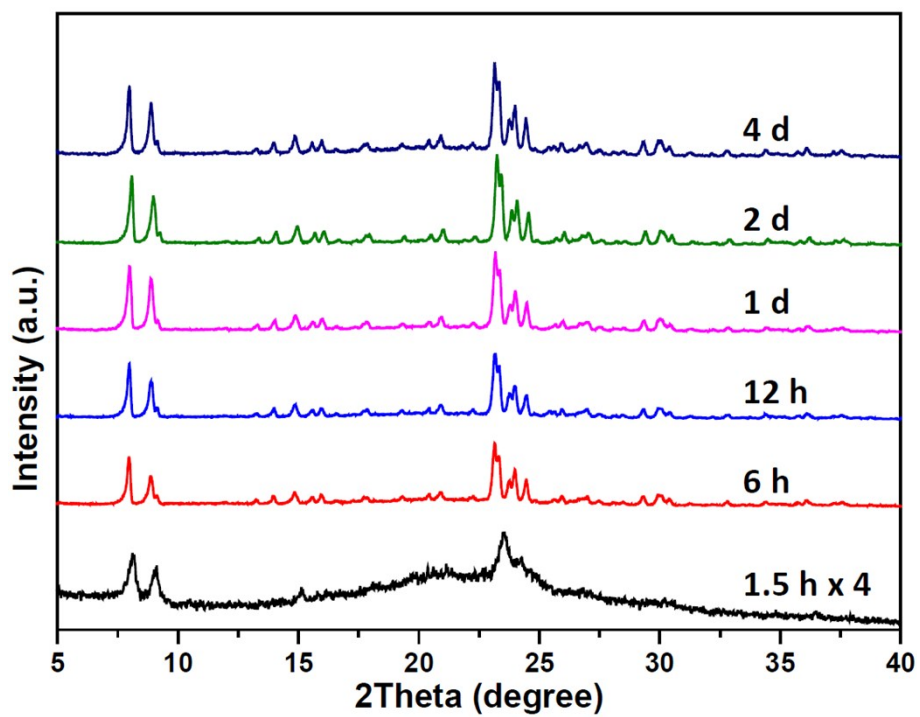

Fig. S1 XRD patterns of conventional TS-1 zeolites of different crystallization time.

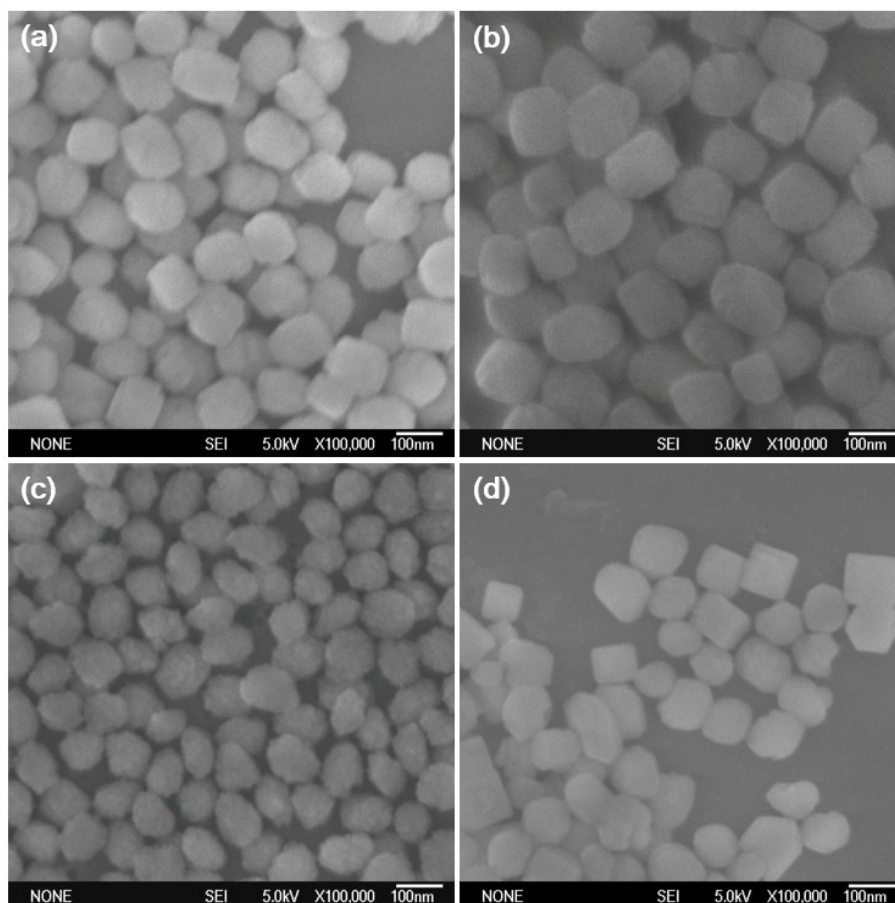

Fig. S2 SEM images of conventional TS-1 (TS-1-C) (a), active seeds-assisted microwave irradiation TS-1 (TS-1-AM) (b), active seeds-assisted TS-1 (TS-1-A) (c), microwave-assisted TS-1 (TS-1-M) (d) zeolites.

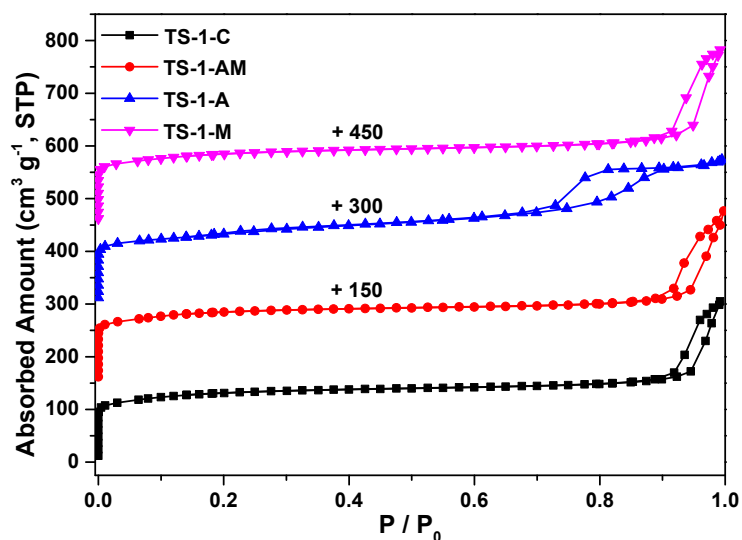

Fig. S3 N<sub>2</sub> adsorption–desorption isotherms of different TS-1 zeolites.

Table S1 textural properties of different TS-1 zeolites.

| samples | $S_{\text{BET}}$<br>(m <sup>2</sup> /g) <sup>a</sup> | $S_{\text{micro}}$<br>(m <sup>2</sup> /g) <sup>b</sup> | $S_{\text{ext}}$<br>(m <sup>2</sup> /g) <sup>b</sup> | $V_{\text{micro}}$<br>(cm <sup>3</sup> /g) <sup>b</sup> |
|---------|------------------------------------------------------|--------------------------------------------------------|------------------------------------------------------|---------------------------------------------------------|
| TS-1-C  | 439.1                                                | 271.9                                                  | 167.2                                                | 0.13                                                    |
| TS-1-AM | 451.2                                                | 280.9                                                  | 170.3                                                | 0.13                                                    |
| TS-1-A  | 449.8                                                | 234.9                                                  | 214.9                                                | 0.11                                                    |
| TS-1-M  | 452.5                                                | 272.5                                                  | 180.0                                                | 0.13                                                    |

a.  $S_{\text{BET}}$  (total surface area) calculated using the BET method; b.  $S_{\text{micro}}$  (micropore area),  $S_{\text{ext}}$  (external surface area) and  $V_{\text{micro}}$  (micropore volume) calculated using the t-plot method.

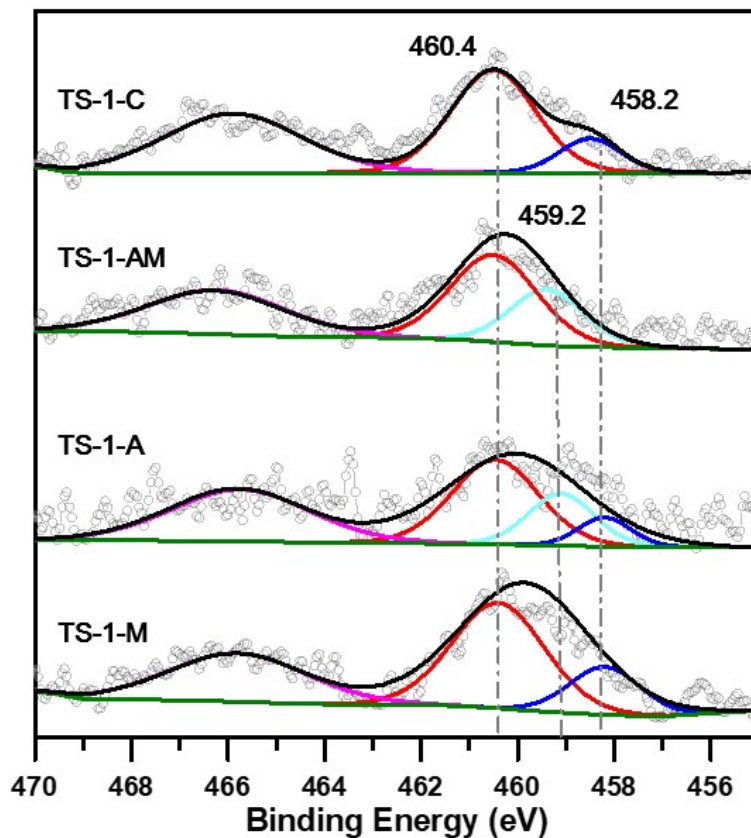

Fig. S4 XPS spectra of TS-1-C, TS-1-AM, TS-1-A, TS-1-M zeolites.

The XPS spectra of the Ti 2p region are presented in Fig. S4. The peaks at 460.4, 459.2 and 458.2 eV should be attributed to framework  $\text{TiO}_4$ , high coordinated Ti species and anatase  $\text{TiO}_2$ , respectively.<sup>[1-2]</sup>

1. L. Z. Wu, X. J. Deng, S. F. Zhao, H. M. Yin, Z. X. Zhuo, X. Q. Fang, Y. M. Liu and M. Y. He, *Chem. Commun.*, 2016, **52**, 8679-8682.

2. A. C. Alba-Rubio, J. L. G. Fierro, L. León-Reina, R. Mariscal, J. A. Dumesic, M. López. Granados, *Appl. Catal., B*, 2017, **202**, 269-280.

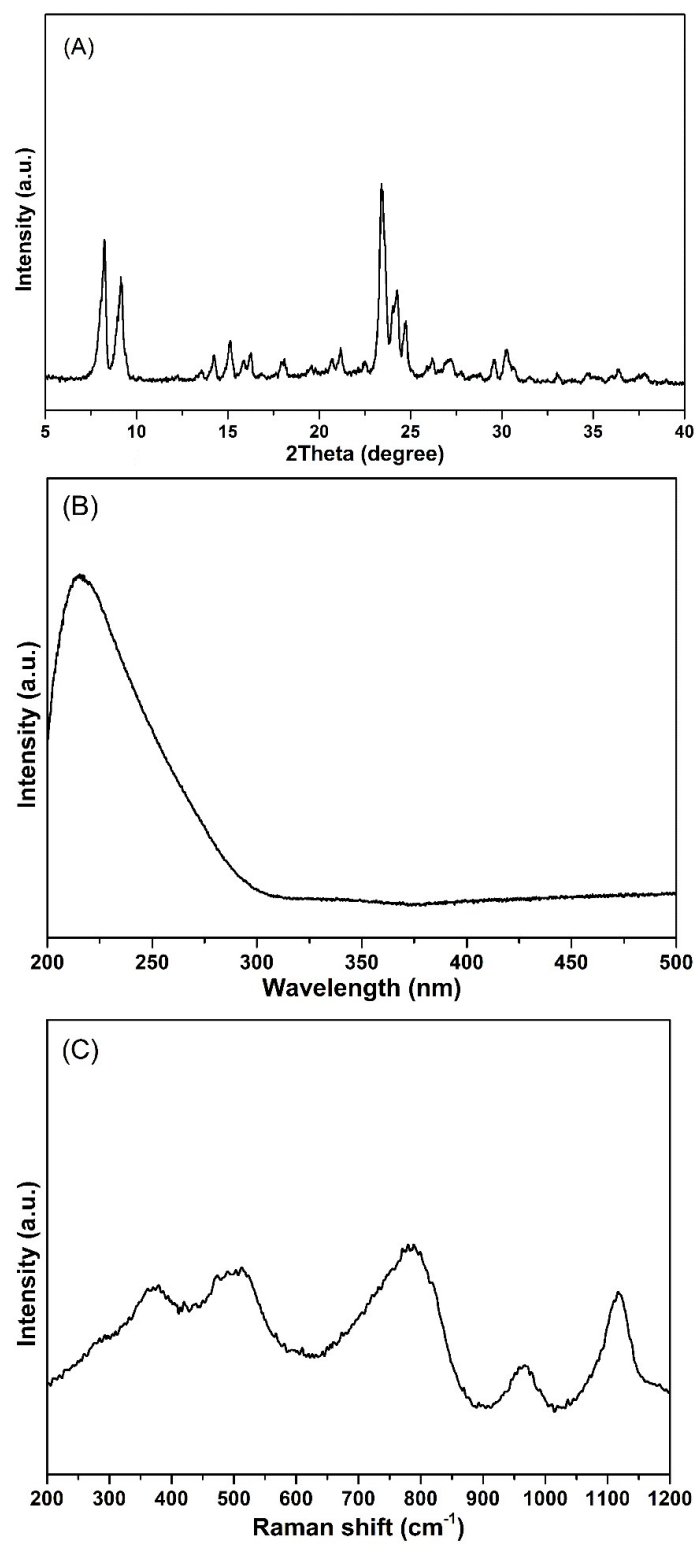

Fig. S5 The XRD patterns (A), UV-vis (B) and UV-Raman (C) spectra of TS-1-TiO<sub>4</sub> zeolite.

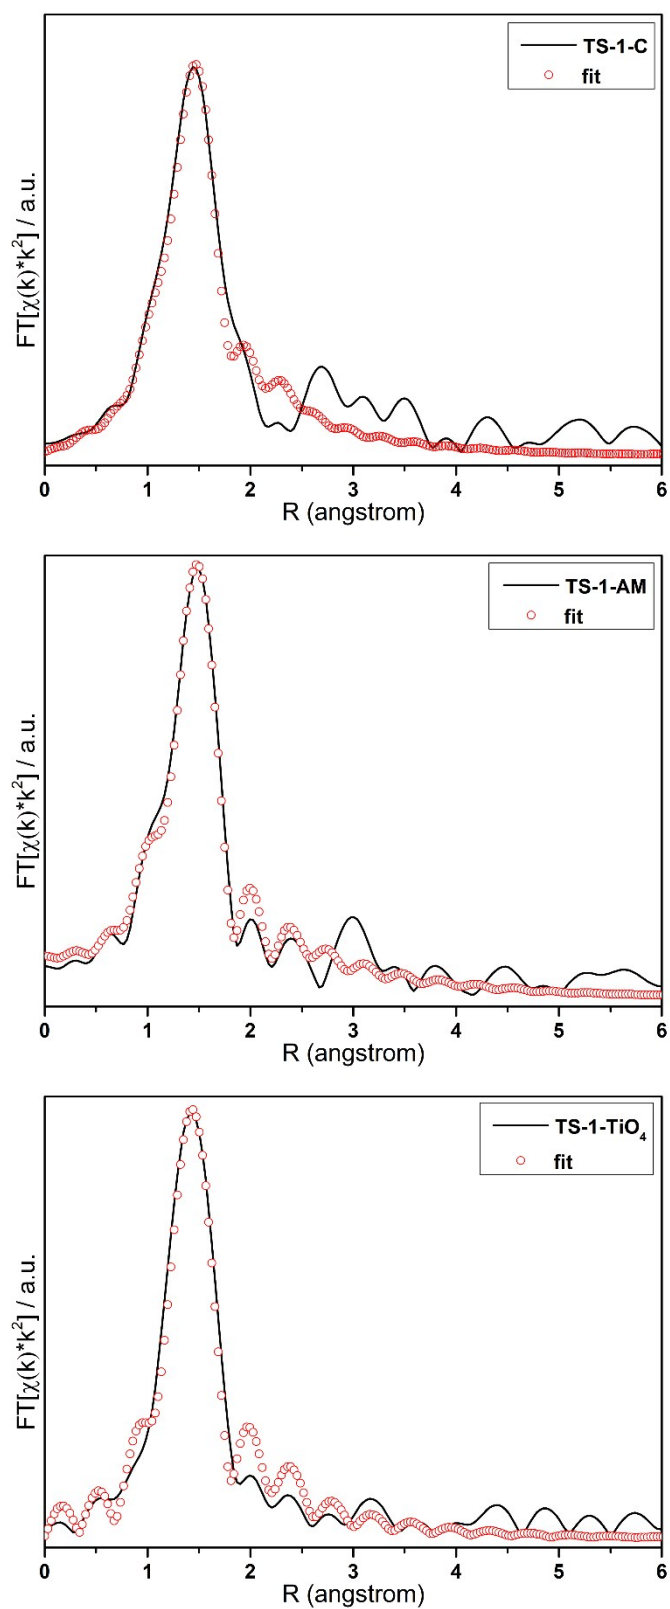

Figure S6. Experimental data (solid black lines) and fits (empty red circles) of Fourier-transformed Ti K edge EXAFS spectra for different TS-1 zeolites.



Table S2. Structural parameters of different TS-1 zeolites extracted from the EXAFS fitting.

| <b>Sample</b>         | <b>Shell</b> | <b>C.N.</b> | <b>R (Å)</b> | <b><math>\sigma</math> (Å<sup>2</sup>)</b> | <b><math>\Delta E_0</math><br/>(eV)</b> | <b>R-factor<br/>(%)</b> |
|-----------------------|--------------|-------------|--------------|--------------------------------------------|-----------------------------------------|-------------------------|
| TS-1-C                | Ti-O         | 4.5(8)      | 1.84(2)      | 0.004(3)                                   | 5.2(3)                                  | 2.4                     |
| TS-1-AM               | Ti-O         | 4.3(6)      | 1.83(1)      | 0.001(1)                                   | 9.6(3)                                  | 0.9                     |
| TS-1-TiO <sub>4</sub> | Ti-O         | 4           | 1.82(1)      | 0.0004(1)                                  | 6.8(2)                                  | 2.2                     |

C.N. is the coordination number; R is bond distance;  $\sigma^2$  is Debye-Waller factor (a measure of thermal and static disorder in absorber-scatterer distances);  $\Delta E_0$  is edge-energy shift (the difference between the zero-kinetic energy value of the sample and that of the theoretical model). R factor is used to value the goodness of the fitting.

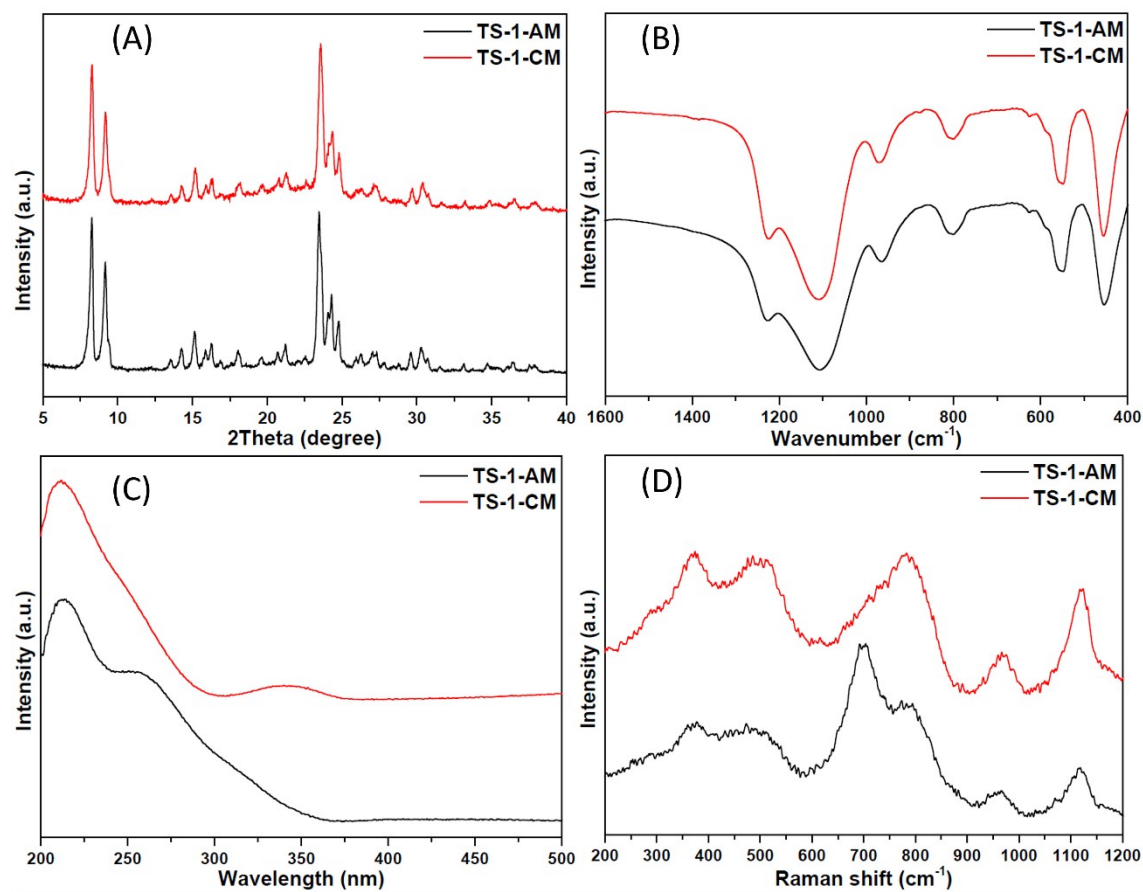

Fig. S7 The XRD patterns (A), UV-vis (B), FTIR (C) and UV-Raman (D) spectra of TS-1-AM and TS-1-CM zeolites.

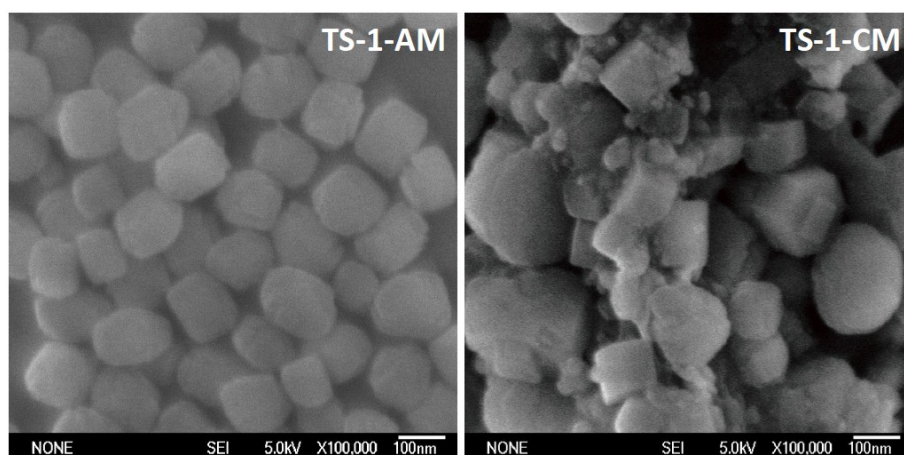

Fig. S8 The SEM images of TS-1-AM and TS-1-CM zeolites.

Table S3 Epoxidation of 1-hexene over different TS-1 catalysts

|         | $I_{960/800}$ | Si/Ti <sup>a</sup> | Conv. (%) | Sel. (%) |        | TON <sup>b</sup> |
|---------|---------------|--------------------|-----------|----------|--------|------------------|
|         |               |                    |           | epoxide  | others |                  |
| TS-1-AM | 1.10          | 80                 | 28.0      | 90.0     | 10.0   | 272              |
| TS-1-CM | 1.13          | 71                 | 20.1      | 90.1     | 9.9    | 177              |

a. The elemental compositions are determined by XRF; b. TON in mol (mol of Ti)<sup>-1</sup>, turnover number per Ti site for 1-hexene conversion. Reaction conditions: catalyst 50 mg, 1-hexene 10 mmol, H<sub>2</sub>O<sub>2</sub> 10 mmol, CH<sub>3</sub>OH 10 mL, temp. 333 K, time 2 h. Others, 1-methoxyhexan-2-ol, 2-methoxyhexan-1-ol, 1,2-hexanediol.

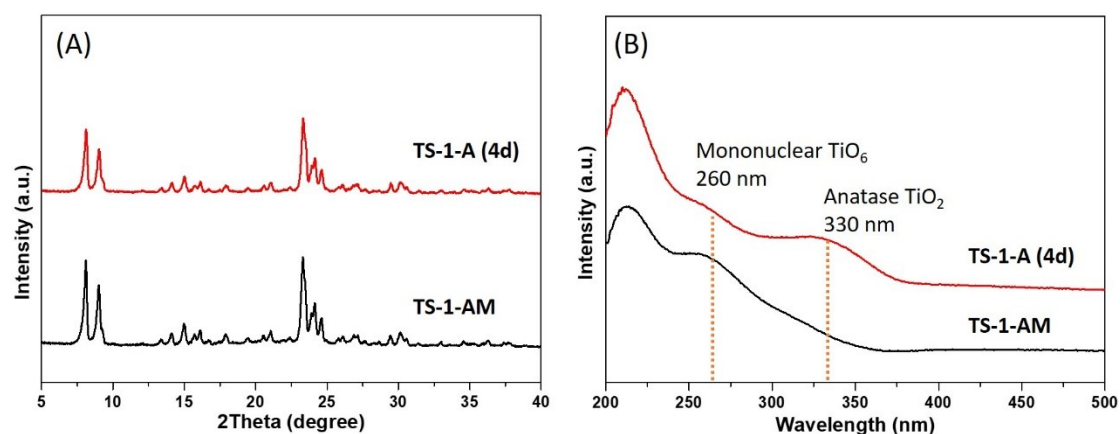

Fig. S9 The XRD patterns (A) and UV-vis (B) spectra of TS-1-AM and TS-1-A (4d).

Table S4 Epoxidation of 1-hexene over different TS-1 catalysts

|                       | Si/Ti <sup>a</sup> | Conv. (%) | Sel. (%) |        | TON <sup>b</sup> |
|-----------------------|--------------------|-----------|----------|--------|------------------|
|                       |                    |           | epoxide  | others |                  |
| TS-1-AM               | 80                 | 28.0      | 90.0     | 10.0   | 272              |
| TS-1-TiO <sub>4</sub> | 90                 | 16.5      | 95.6     | 4.4    | 181              |
| TS-1-A (4d)           | 69                 | 18.6      | 92.4     | 7.6    | 156              |

a. The elemental compositions are determined by XRF; b. TON in mol (mol of Ti)<sup>-1</sup>, turnover number per Ti site for 1-hexene conversion. Reaction conditions: catalyst 50 mg, 1-hexene 10 mmol, H<sub>2</sub>O<sub>2</sub> 10 mmol, CH<sub>3</sub>OH 10 mL, temp. 333 K, time 2 h. Others, 1-methoxyhexan-2-ol, 2-methoxyhexan-1-ol, 1,2-hexanediol.

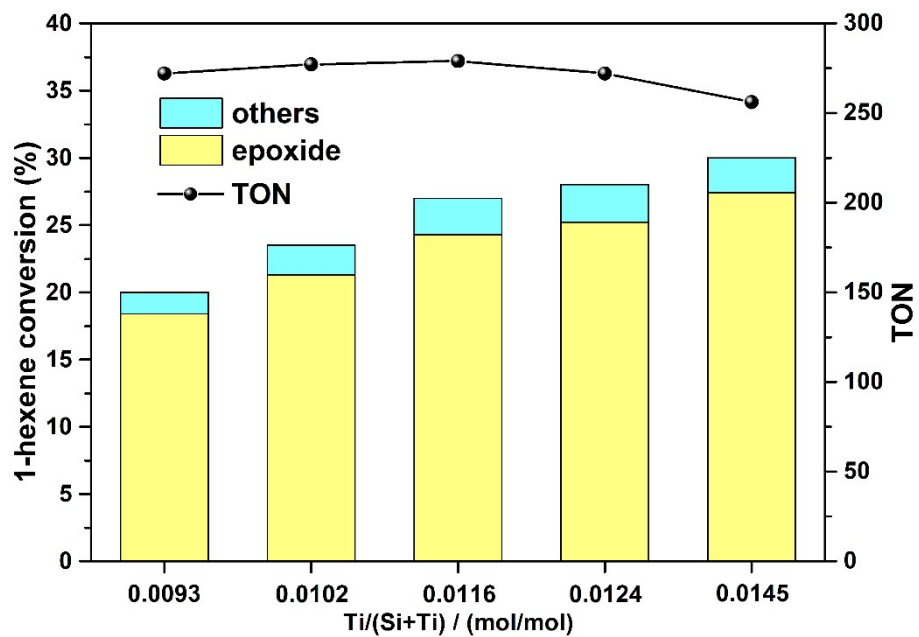

Fig. S10 Epoxidation of 1-hexene over TS-1-AM with various Ti contents.

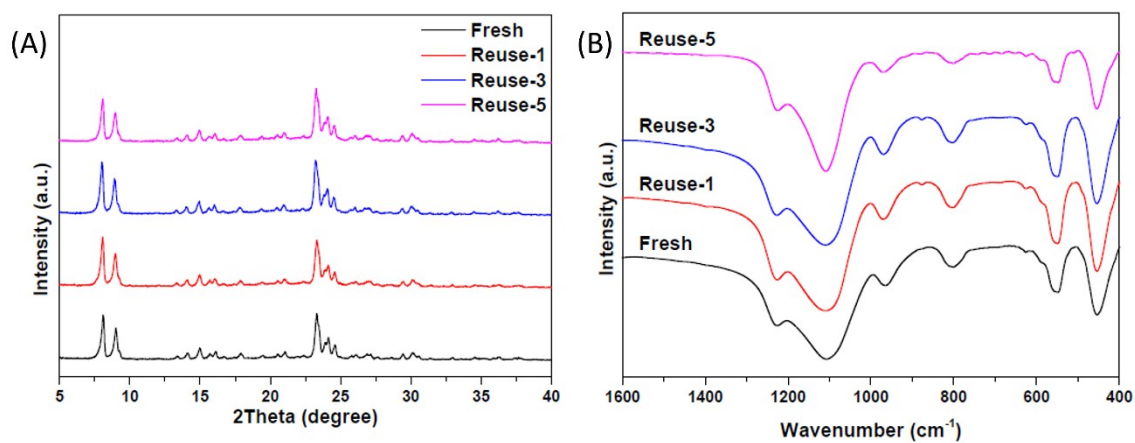

Fig. S11 The XRD patterns (A) and FT-IR (B) spectra of TS-1-AM in reuse test.
